# Supplementary material
Source: MDPI journal article supplement (https://www.mdpi.com/2220-9964/12/12/495)
Supplement: s1 [file s1]

```

1  -----
2  /* AGGREGATED SHAPE SIMILARITY INDEX (ASI) */
3  -----
4
5  /* 1. Transformation into the same coordinate system */
6  -----
7
8      -- creation of the tables tab_a and tab_b (transformed in the same coordinate
9      system)
10
11      -- tables dubravka_inspire, tab_a - INSPIRE Buildings - Bratislava/Dúbravka
12      (Slovakia)
13      -- tables dubravka_osm, tab_b - OSM Buildings - Bratislava/Dúbravka (Slovakia)
14
15      /*EPSG:8353 - S-JTSK [JTSK03] / Krovak East North*/
16
17  DROP TABLE IF EXISTS tab_a;
18
19  CREATE TABLE tab_a AS
20      SELECT id, ST_Transform(geom,8353) AS geom
21      FROM dubravka_inspire;
22
23  DROP TABLE IF EXISTS tab_b;
24
25  CREATE TABLE tab_b AS
26      SELECT id, ST_Transform(geom,8353) AS geom
27      FROM dubravka_osm;
28
29  /* 2. Creation of buffers with a distance of 0 m */
30  -----
31
32      -- creation of the table buf_a from tab_a
33
34  DROP TABLE IF EXISTS buf_a;
35
36  CREATE TABLE buf_a AS
37      SELECT (ST_Dump(ST_Buffer(ST_Union(a.geom),0))).geom AS geom
38      FROM tab_a a;
39
40  ALTER TABLE buf_a ADD COLUMN id_a SERIAL PRIMARY KEY;
41
42      -- creation of the table buf_b from tab_b
43
44  DROP TABLE IF EXISTS buf_b;
45
46  CREATE TABLE buf_b AS
47      SELECT (ST_Dump(ST_Buffer(ST_Union(b.geom),0))).geom AS geom
48      FROM tab_b b;
49
50  ALTER TABLE buf_b ADD COLUMN id_b SERIAL PRIMARY KEY;
51
52  /* 3. Counting polygons in the buffers */
53  -----
54
55      -- counting of polygons in each buffer from buf_a -> attribute num_pol
56
57  DROP TABLE IF EXISTS num_pol_a;
58
59  CREATE TEMPORARY TABLE num_pol_a AS
60      SELECT id_a, COUNT(id) AS num_pol
61      FROM (
62          SELECT
63              id,
64              id_a,
65              ST_Intersection(tab_a.geom,buf_a.geom) AS geom
66          FROM tab_a, buf_a
67          WHERE tab_a.geom && buf_a.geom AND ST_Within(tab_a.geom,buf_a.geom)
68          ) AS int_a_buf_a
69      GROUP BY id_a
70      ORDER BY id_a;
71

```

```

72 CREATE OR REPLACE VIEW v_buf_a AS
73 SELECT *
74 FROM buf_a
75 INNER JOIN num_pol_a USING (id_a);
76
77 -- counting of polygons in each buffer from buf_B -> attribute num_pol
78
79 DROP TABLE IF EXISTS num_pol_b;
80
81 CREATE TEMPORARY TABLE num_pol_b AS
82 SELECT id_b, COUNT(id) AS num_pol
83 FROM (
84     SELECT
85         id,
86         id_b,
87         ST_Intersection(tab_b.geom,buf_b.geom) AS geom
88     FROM tab_b, buf_b
89     WHERE tab_b.geom && buf_b.geom AND ST_Within(tab_b.geom,buf_b.geom)
90     ) AS int_b_buf_b
91 GROUP BY id_b
92 ORDER BY id_b;
93
94 CREATE OR REPLACE VIEW v_buf_b AS
95 SELECT *
96 FROM buf_b
97 INNER JOIN num_pol_b USING (id_b);
98
99
100 /* 4. Creation of intersections of buf_a and buf_b
101 and calculation of their parameters (area, perimeter, number of vertices) */
102 -----
103
104 DROP TABLE IF EXISTS int_a_b;
105
106 CREATE TEMPORARY TABLE int_a_b AS
107 SELECT
108     id_a,
109     id_b,
110     aa.geom AS geom_a,
111     bb.geom AS geom_b,
112     ST_Intersection(aa.geom,bb.geom) AS geom_int,
113     ST_Area(aa.geom) AS area_a,
114     ST_Area(bb.geom) AS area_b,
115     ST_Perimeter(aa.geom) AS perim_a,
116     ST_Perimeter(bb.geom) AS perim_b,
117     ST_NPoints(aa.geom) AS num_vert_a,
118     ST_NPoints(bb.geom) AS num_vert_b,
119     AA.num_pol AS num_pol_a,
120     BB.num_pol AS num_pol_b,
121     ST_Area(ST_Intersection(aa.geom,bb.geom)) AS area_int
122 FROM v_buf_a AS aa, v_buf_b AS bb
123 WHERE aa.geom && bb.geom AND ST_Intersects(aa.geom,bb.geom);
124
125
126 /* 5. Calculation of subindices of similarity
127 -----
128
129 -- a. sim_tanimoto, sim_dice
130
131 -- b. sim_hausdorff, sim_frechet
132
133 -- c. sim_area, sim_perimeter, sim_vertices, sim_polygons
134
135 -- d. sim_d (distance), sim_s (set), sim_sh (shape)*/
136
137 ALTER TABLE int_a_b
138 ADD sim_tanimoto numeric GENERATED ALWAYS AS (area_int/(area_a+area_b-area_int))
139 STORED,
140 ADD sim_dice numeric GENERATED ALWAYS AS (2*area_int/(area_a+area_b)) STORED,
141 ADD sim_hausdorff numeric GENERATED ALWAYS AS (
142     1- LEAST(1, ST_HausdorffDistance(geom_a, geom_b)/15)) STORED,
143 ADD sim_frechet numeric GENERATED ALWAYS AS (
144     1-LEAST(1, ST_FrechetDistance(geom_a, geom_b)/15)) STORED,

```

```

144 ADD sim_area numeric GENERATED ALWAYS AS (
145     GREATEST(1-ABS((area_a-area_b)/GREATEST(area_a,area_b)),0)) STORED,
146 ADD sim_perimeter numeric GENERATED ALWAYS AS (
147     GREATEST((1-ABS((perim_a-perim_b)/GREATEST(perim_a,perim_b))),0)) STORED,
148 ADD sim_vertices numeric GENERATED ALWAYS AS (
149     GREATEST(1 - ABS((num_vert_a-num_vert_b)::float/GREATEST(num_vert_a,num_vert_b
150     )::float),0)) STORED,
151 ADD sim_polygons numeric GENERATED ALWAYS AS (
152     LEAST(((num_pol_a)::float/(num_pol_b)::float),((num_pol_b)::float/(num_pol_a
153     )::float))) STORED;
154
155 DROP TABLE IF EXISTS sim_a_b;
156
157 CREATE TABLE sim_a_b AS
158     SELECT
159         id_a,
160         id_b,
161         --geom_a,
162         --geom_b,
163         geom_int,
164         sim_dice,
165         sim_tanimoto,
166         sim_hausdorff,
167         sim_frechet,
168         sim_area,
169         sim_perimeter,
170         sim_vertices,
171         sim_polygons,
172         GREATEST(sim_hausdorff,sim_frechet) AS sim_d,
173         sim_tanimoto AS sim_s,
174         LEAST(sim_area,sim_perimeter) AS sim_sh
175     FROM int_a_b;
176
177 /* 6. Calculation of aggreagted similarity indices
178 -----
179
180     -- sim_min - using the MIN aggregation function
181
182     -- sim_max - using the MAX aggregation function
183
184     -- sim_avg - using the AVG aggtegation
185
186     -- sim_agr - using new proposed aggregation (aggregated shape similarity index
187     ASI)*/
188
189 ALTER TABLE sim_a_b
190     ADD sim_min numeric GENERATED ALWAYS AS (LEAST(sim_d,sim_s,sim_sh)) STORED,
191     ADD sim_max numeric GENERATED ALWAYS AS (GREATEST(sim_d,sim_s,sim_sh)) STORED,
192     ADD sim_avg numeric GENERATED ALWAYS AS ((sim_d+sim_s+sim_sh)/3) STORED,
193     ADD sim_agr numeric GENERATED ALWAYS AS (LEAST(GREATEST(sim_d,sim_s),sim_sh))
194     STORED;
195
196 /* 7. Deciding on category of similarity or change
197 -----
198
199     -- sim_cat: Identical, Moved or rotated, Generalised or slightly changed,
200     Different (Different number of objects)*/
201
202 DROP TABLE IF EXISTS sim_cat_a_b;
203
204 CREATE TABLE sim_cat_a_b AS SELECT DISTINCT id_A, id_B, geom_int as geom, sim_d, sim_s
205 , sim_sh, sim_agr, sim_vertices,
206     CASE WHEN sim_agr > 0.75 THEN 'Identical'
207     ELSE
208     CASE
209         WHEN sim_sh > 0.75 AND sim_vertices = 1 AND sim_s < 0.75 AND sim_d <
210         0.75 THEN 'Moved or rotated'
211         WHEN sim_agr > 0.5 OR sim_d > 0.75 OR sim_s > 0.75 OR sim_area > 0.75
212         THEN 'Generalised or slightly changed'
213         --WHEN sim_polygons < 1 THEN 'Different number of objects'

```

```

209         ELSE 'Different'
210     END
211     END AS sim_cat FROM sim_a_b
212     ORDER BY sim_cat;
213
214
215  /* 8. Calculation of the basic statistical characteristics of results*/
216  -----
217
218      -- average values of aggregated similarity indices
219
220  SELECT AVG(sim_min) AS min, AVG(sim_max) As max, AVG(sim_avg) AS avg, AVG(sim_agr) AS
agr
221  FROM sim_a_b;
222
223      -- number of objects in all categories
224
225  SELECT sim_cat, COUNT(sim_cat)
226  FROM sim_cat_a_b
227  GROUP BY sim_cat;
228
229  -----
230  --END
231

```
